# Supplementary material for: A quaternary ammonium-based nanosystem enables delivery of CRISPR/Cas9 for cancer therapy
Source: Royal Society of Chemistry journal article supplement (doi:10.1039/d3bm01629c), 2024-01-01
Supplement: d3bm01629c1.pdf [file d3bm01629c1.pdf]

## Supplementary Information

### Quaternary ammonium-based nanosystem enables delivery of CRISPR/Cas9 for cancer therapy

Mengzhu Zhang,<sup>a,‡</sup> Siyu Sun,<sup>a,‡</sup> Xiao Liang,<sup>a</sup> Zengguang Liu,<sup>a</sup> Jiaxin Yin,<sup>a</sup> Quanshun  
Li,<sup>\*a,b</sup> and Shengcai Yang<sup>\*a</sup>

*<sup>a</sup>Key Laboratory for Molecular Enzymology and Engineering of Ministry of Education,  
School of Life Sciences, Jilin University, Changchun 130012, China*

*<sup>b</sup>Center for Supramolecular Chemical Biology, Jilin University, Changchun 130012,  
China*

\*Corresponding author.

Tel. and Fax: +86-431-85155200.

Email: [yang\\_shengcai@jlu.edu.cn](mailto:yang_shengcai@jlu.edu.cn) (S. Yang); E-mail: [quanshun@jlu.edu.cn](mailto:quanshun@jlu.edu.cn) (Q. Li).

‡These authors contributed equally to this work.

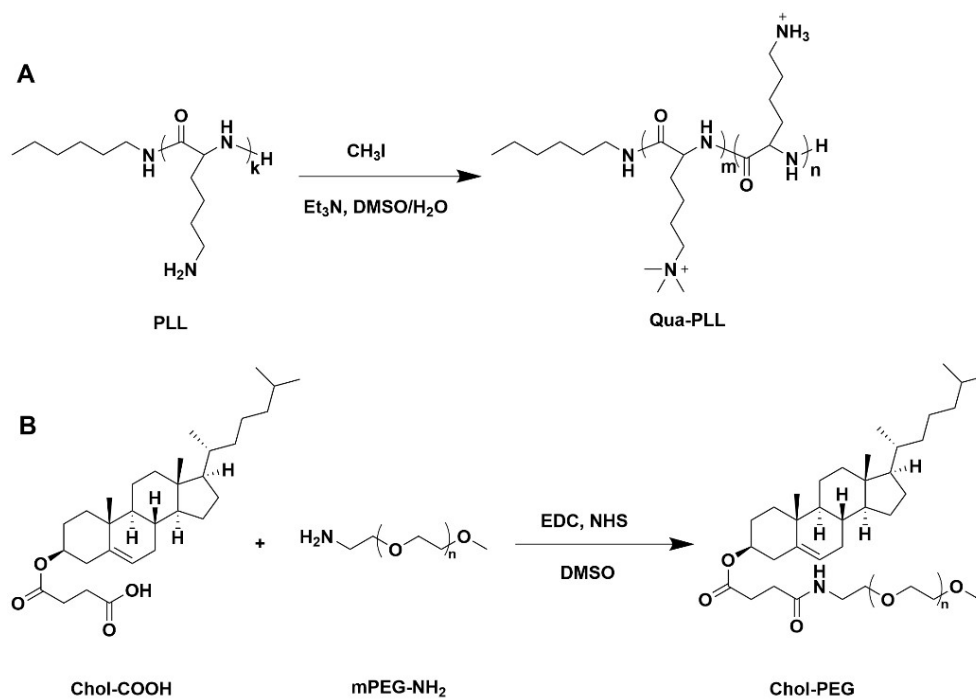

**Figure S1.** The synthetic routes of (A) Qua-PLL and (B) Chol-PEG.

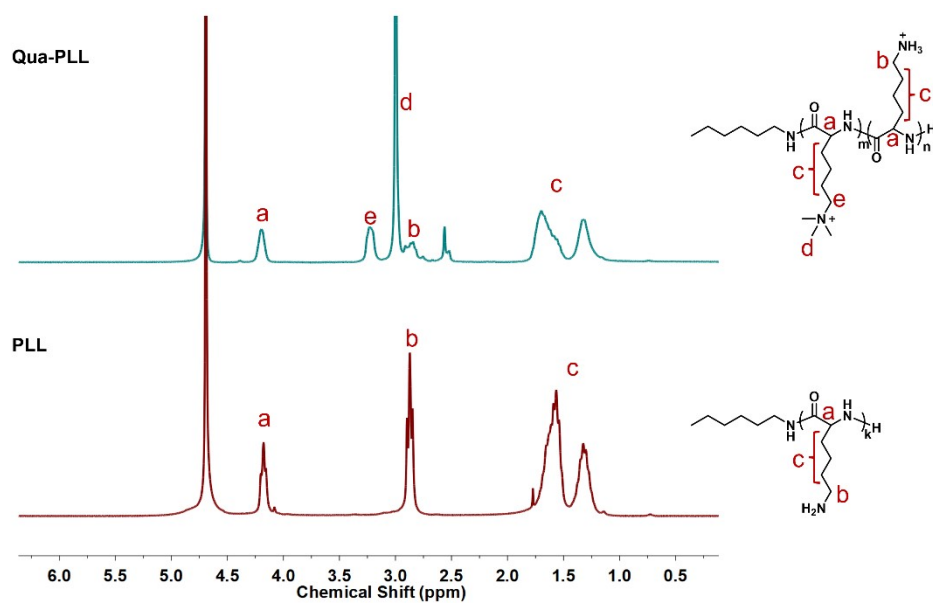

**Figure S2.** The  $^1\text{H}$  NMR spectrum of Qua-PLL and PLL in  $\text{D}_2\text{O}$ .

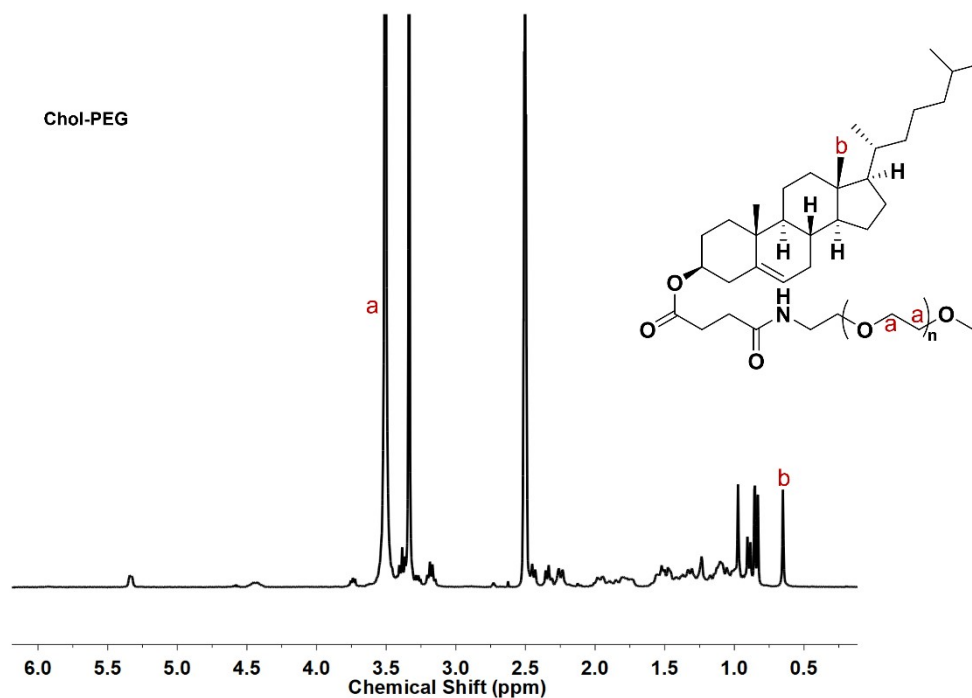

**Figure S3.** The  $^1\text{H}$  NMR spectrum of Chol-PEG in  $\text{DMSO-}d_6$ .

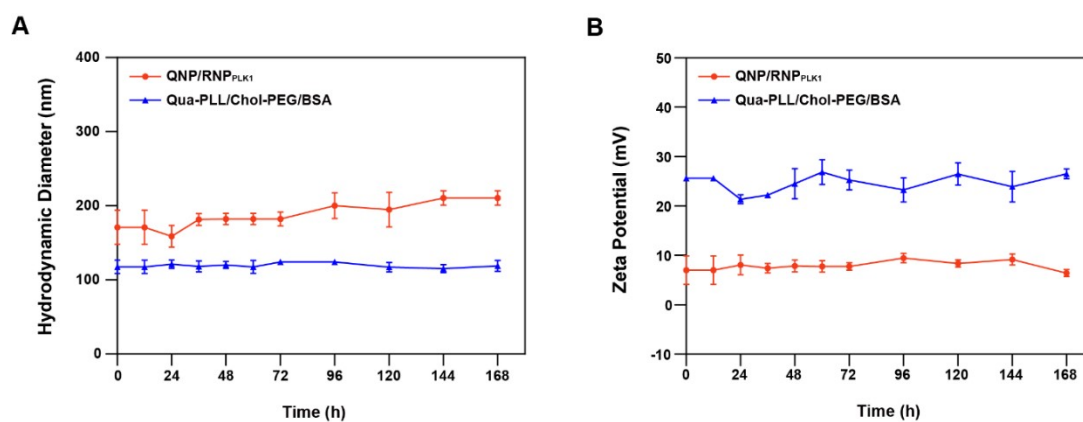

**Figure S4.** Hydrodynamic diameter (A) and zeta potential (B) changes of QNP/RNP<sub>PLK1</sub> and Qua-PLL/Chol-PEG/BSA during the incubation in PBS for 7 days. Data were presented as mean value  $\pm$  SD of triplicate experiments.

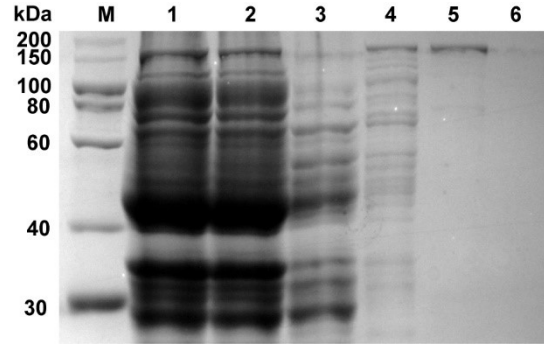

**Figure S5.** The SDS-PAGE analysis of purified Cas9. The calculated molecular weight of Cas9 was ~160 kDa. Lane M: protein marker; lane 1: lysates of whole bacterial cells; lane 2: supernatants of lysates; lane 3: effluent fractions of loading sample; lane 4: the fraction eluted with 50 mM imidazole; lane 5: the fraction eluted with 300 mM imidazole; lane 6: the fraction eluted with 500 mM imidazole.

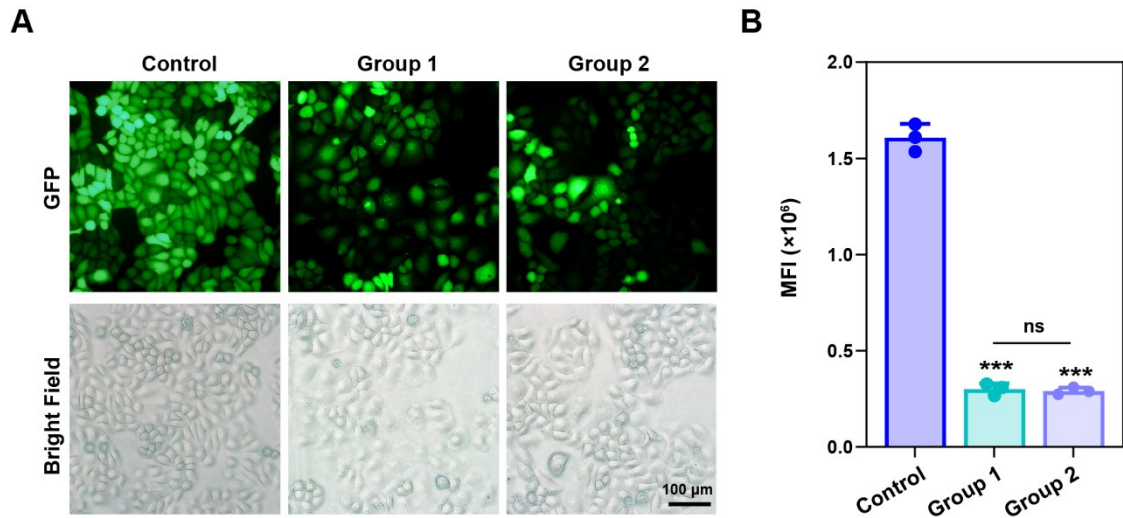

**Figure S6.** The *in vitro* GFP disruption of HeLa-GFP cells mediated by Lipo2000/RNP<sub>GFP</sub> without ultrasonication (group 1) and with the ultrasonication for 30 min (group 2). A: fluorescence microscopy analysis; B: quantification of GFP expression in HeLa-GFP cells (\*\*\* $p < 0.001$  vs. Control group; ns: no significance).

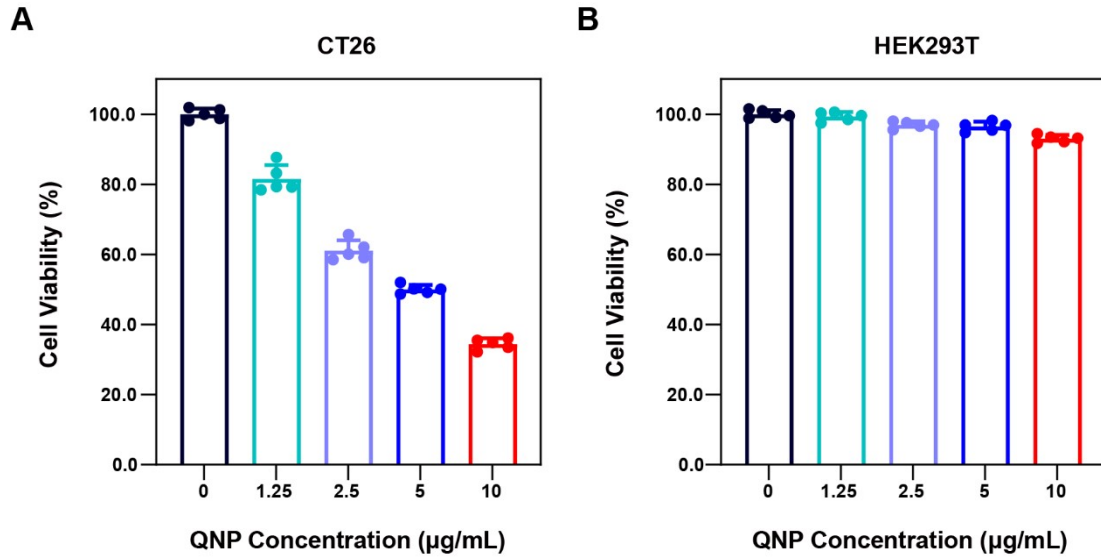

**Figure S7.** Cell viability of CT26 (A) and HEK293T (B) after the treatment with QNP/RNP<sub>PLK1</sub> with different QNP concentrations (Cas9 concentration: 2 µg/mL). Data were presented as mean value  $\pm$  SD of five experiments.

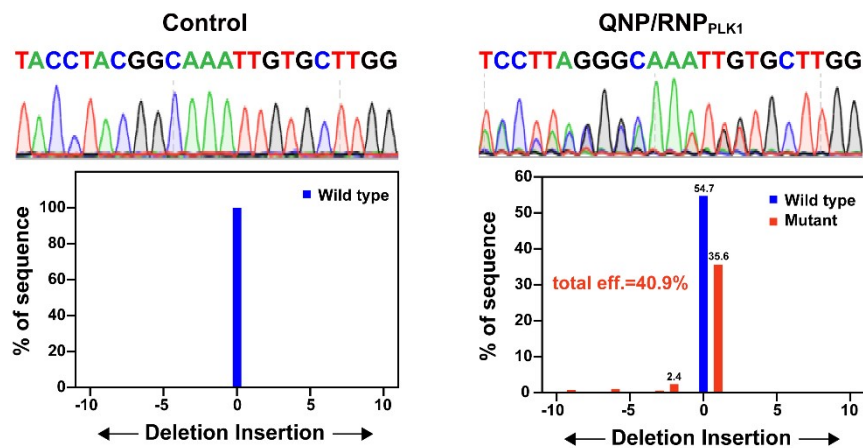

**Figure S8.** T-A cloning sequencing results of the targeted *PLK1* locus in MCF-7 cells treated with PBS and QNP/RNP<sub>PLK1</sub>.

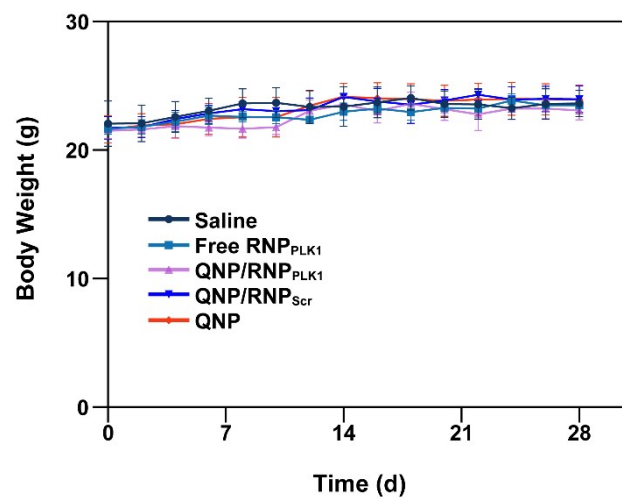

**Figure S9.** The changes of body weight within 28 days after different administration.
